# Supplementary material for: Spatial Genetic Structure and Pathogenic Race Composition at the Field Scale in the Sunflower Downy Mildew Pathogen, Plasmopara halstedii
Source: MDPI journal article supplement (doi:10.3390/jof8101084), 2022-10-14
Supplement: s1 [file s1]

## Spatial genetic structure and pathogenic race composition at the field scale in the sunflower downy mildew pathogen, *Plasmopara halstedii*

Abdelhameed Elameen<sup>1\*</sup>, Denis Tourvieille de Labrouhe<sup>2</sup>, Emmanuelle Bret -Mestries<sup>3</sup>, and Francois Delmotte<sup>4\*</sup>

<sup>1</sup>NIOBIO, Norwegian Institute of Bioeconomy Research, Division of Biotechnology and Plant Health, N-1431 Ås, Norway

<sup>2</sup>Sainte-Anastasia, Le Bourg, 15170 Neussargues en Pinatelle, France

<sup>3</sup>Terres Inovia, Domaine de Magneraud, 17700 Saint-Pierre d'Amilly, France

<sup>4</sup>INRAE, Bordeaux Sciences Agro, ISVV, SAVE, 33140 Villenave d'Ornon, France

\* Authors to whom correspondence should be addressed; e-Mail: abdelhameed.elameen@nibio.no and francois.delmotte@inrae.fr

**Supplementary Table S1.** The 64 races, the Id number of the total of the 250 sunflower downy mildew isolates and the total number of alleles detected using the 13 molecular markers in the study.

| No | Id    | race | Pha6   | Pha39  | Pha42  | Pha43  | Pha54  | Pha56  | Pha74  | Pha79  | Pha82  | Pha99  | Pha106 | Pha120 | Ph7    |
|----|-------|------|--------|--------|--------|--------|--------|--------|--------|--------|--------|--------|--------|--------|--------|
| 1  | h1217 | 304  | 200200 | 100100 | 100100 | 100100 | 100100 | 100100 | 100100 | 300300 | 100200 | 200200 | 200200 | 100100 | 205209 |
| 2  | h1219 | 304  | 200200 | 200200 | 100100 | 100100 | 100100 | 100100 | 100100 | 300300 | 200200 | 200200 | 100100 | 200200 | 301301 |
| 3  | h1221 | 304  | 200200 | 200200 | 100100 | 100100 | 100100 | 100100 | 100100 | 300300 | 200200 | 200200 | 100100 | 200200 | 297337 |
| 4  | h1223 | 304  | 200200 | 200200 | 100100 | 100100 | 100100 | 100100 | 100100 | 300300 | 200200 | 200200 | 100100 | 200200 | 217217 |
| 5  | h1225 | 304  | 200200 | 200200 | 100100 | 100100 | 100100 | 100100 | 100100 | 300300 | 200200 | 200200 | 100100 | 200200 | 297297 |
| 6  | h1227 | 304  | 200200 | 200200 | 100100 | 100100 | 100100 | 100100 | 100100 | 300300 | 200200 | 200200 | 100100 | 200200 | 205307 |
| 7  | h1229 | 304  | 200200 | 200200 | 100100 | 100100 | 100100 | 100100 | 100100 | 300300 | 200200 | 200200 | 100100 | 200200 | 311311 |
| 8  | h1434 |      | 100100 | 100200 | 100100 | 100100 | 100100 | 100100 | 100100 | 300300 | 100200 | 100100 | 100200 | 100100 | 205307 |
| 9  | h1435 |      | 100100 | 200200 | 100100 | 100100 | 100100 | 100100 | 100100 | 200200 | 200200 | 100100 | 200200 | 100100 | 205205 |
| 10 | h1436 |      | 200200 | 200200 | 100100 | 100100 | 100100 | 100100 | 100100 | 300300 | 200200 | 200200 | 100100 | 200200 | 311311 |
| 11 | h1437 |      | 200200 | 200200 | 100100 | 100100 | 100100 | 100100 | 100100 | 300300 | 200200 | 200200 | 100100 | 200200 | 301301 |
| 12 | h1231 | 304  | 200200 | 200200 | 100100 | 100100 | 100100 | 100100 | 100100 | 300300 | 200200 | 200200 | 100100 | 200200 | 301301 |
| 13 | h1439 |      | 200200 | 200200 | 100100 | 100100 | 100100 | 100100 | 100100 | 300300 | 200200 | 200200 | 100100 | 200200 | 311311 |
| 14 | h1440 |      | 100100 | 100100 | 100100 | 100100 | 100100 | 100100 | 100100 | 200200 | 100200 | 100100 | 200200 | 100100 | 205205 |
| 15 | h1441 |      | 200200 | 200200 | 100100 | 100100 | 100100 | 100100 | 100100 | 300300 | 200200 | 200200 | 100100 | 200200 | 321321 |
| 16 | h1442 |      | 200200 | 200200 | 100100 | 100100 | 100100 | 100100 | 100100 | 300300 | 200200 | 200200 | 100100 | 200200 | 311311 |
| 17 | h1233 | 304  | 200200 | 200200 | 100100 | 100100 | 100100 | 100100 | 100100 | 300300 | 200200 | 200200 | 100100 | 200200 | 217311 |
| 18 | h1444 |      | 200200 | 200200 | 100100 | 100100 | 100100 | 100100 | 100100 | 300300 | 200200 | 200200 | 100100 | 200200 | 307307 |
| 19 | h1445 |      | 200200 | 200200 | 100100 | 100100 | 100100 | 100100 | 100100 | 300300 | 200200 | 200200 | 100100 | 200200 | 301301 |
| 20 | h1446 |      | 200200 | 200200 | 100100 | 100100 | 100100 | 100100 | 100100 | 300300 | 200200 | 200200 | 100100 | 200200 | 307307 |
| 21 | h1447 |      | 100100 | 100100 | 100100 | 100100 | 100100 | 100100 | 100100 | 200200 | 100200 | 100100 | 200200 | 100100 | 205205 |
| 22 | h1235 | 304  | 200200 | 200200 | 100100 | 100100 | 100100 | 100100 | 100100 | 300300 | 200200 | 200200 | 100100 | 200200 | 301301 |
| 23 | h1449 |      | 200200 | 200200 | 100100 | 100100 | 100100 | 100100 | 100100 | 300300 | 200200 | 200200 | 100100 | 200200 | 301301 |

|    |       |     |        |        |        |        |        |        |        |        |        |        |        |        |        |
|----|-------|-----|--------|--------|--------|--------|--------|--------|--------|--------|--------|--------|--------|--------|--------|
| 24 | h1450 |     | 200200 | 200200 | 100100 | 100100 | 100100 | 100100 | 100100 | 300300 | 200200 | 200200 | 100100 | 200200 | 301301 |
| 25 | h1451 |     | 100100 | 100100 | 100100 | 100100 | 100100 | 100100 | 100100 | 200200 | 100200 | 100100 | 200200 | 100100 | 205205 |
| 26 | h1452 |     | 200200 | 200200 | 100100 | 100100 | 100100 | 100100 | 100100 | 300300 | 200200 | 200200 | 100100 | 200200 | 301301 |
| 27 | h1237 | 304 | 200200 | 200200 | 100100 | 100100 | 100100 | 100100 | 100100 | 300300 | 200200 | 200200 | 100100 | 200200 | 307311 |
| 28 | h1454 |     | 200200 | 200200 | 100100 | 100100 | 100100 | 100100 | 100100 | 300300 | 200200 | 200200 | 100100 | 200200 | 297297 |
| 29 | h1455 |     | 200200 | 200200 | 100100 | 100100 | 100100 | 100100 | 100100 | 300300 | 200200 | 200200 | 100100 | 200200 | 311311 |
| 30 | h1456 |     | 200200 | 200200 | 100100 | 100100 | 100100 | 100100 | 100100 | 300300 | 200200 | 200200 | 100100 | 200200 | 301301 |
| 31 | h1457 |     | 200200 | 200200 | 100100 | 100100 | 100100 | 100100 | 100100 | 300300 | 200200 | 200200 | 100100 | 200200 | 311311 |
| 32 | h1239 | 304 | 200200 | 200200 | 100100 | 100100 | 100100 | 100100 | 100100 | 300300 | 200200 | 200200 | 100100 | 200200 | 297297 |
| 33 | h1459 |     | 200200 | 200200 | 100100 | 100100 | 100100 | 100100 | 100100 | 300300 | 200200 | 200200 | 100100 | 200200 | 301301 |
| 34 | h1460 |     | 200200 | 200200 | 100100 | 100100 | 100100 | 100100 | 100100 | 300300 | 200200 | 200200 | 100100 | 200200 | 317317 |
| 35 | h1461 |     | 200200 | 200200 | 100100 | 100100 | 100100 | 100100 | 100100 | 300300 | 200200 | 200200 | 100100 | 200200 | 297297 |
| 36 | h1462 |     | 200200 | 200200 | 100100 | 100100 | 100100 | 100100 | 100100 | 300300 | 200200 | 200200 | 100100 | 200200 | 301301 |
| 37 | h1241 | 304 | 200200 | 200200 | 100100 | 100100 | 100100 | 100100 | 100100 | 300300 | 200200 | 200200 | 100100 | 200200 | 311311 |
| 38 | h1464 |     | 200200 | 200200 | 100100 | 100100 | 100100 | 100100 | 100100 | 300300 | 200200 | 200200 | 100100 | 200200 | 307307 |
| 39 | h1465 |     | 200200 | 200200 | 100100 | 100100 | 100100 | 100100 | 100100 | 300300 | 200200 | 200200 | 100100 | 200200 | 307317 |
| 40 | h1466 |     | 200200 | 200200 | 100100 | 100100 | 100100 | 100100 | 100100 | 300300 | 200200 | 200200 | 100100 | 200200 | 307307 |
| 41 | h1467 |     | 200200 | 200200 | 100100 | 100100 | 100100 | 100100 | 100100 | 300300 | 200200 | 200200 | 100100 | 200200 | 307307 |
| 42 | h1243 | 703 | 100100 | 100100 | 100100 | 100100 | 100100 | 100100 | 100100 | 200200 | 200200 | 100100 | 200200 | 100100 | 311311 |
| 43 | h1469 |     | 200200 | 100100 | 100100 | 100100 | 100100 | 100100 | 100100 | 300300 | 200200 | 200200 | 100100 | 200200 | 205205 |
| 44 | h1470 |     | 200200 | 200200 | 100100 | 100100 | 100100 | 100100 | 100100 | 300300 | 200200 | 200200 | 100100 | 200200 | 307307 |
| 45 | h1471 |     | 200200 | 200200 | 100100 | 100100 | 100100 | 100100 | 100100 | 300300 | 200200 | 200200 | 100100 | 200200 | 297297 |
| 46 | h1472 |     | 200200 | 200200 | 100100 | 100100 | 100100 | 100100 | 100100 | 300300 | 200200 | 200200 | 100100 | 200200 | 301301 |
| 47 | h1245 | 304 | 200200 | 200200 | 100100 | 100100 | 100100 | 100100 | 100100 | 300300 | 200200 | 200200 | 100100 | 200200 | 297297 |
| 48 | h1474 |     | 200200 | 200200 | 100100 | 100100 | 100100 | 100100 | 100100 | 300300 | 200200 | 200200 | 100100 | 200200 | 307307 |
| 49 | h1247 | 703 | 100100 | 100100 | 100100 | 100100 | 100100 | 100100 | 100100 | 200200 | 100100 | 100100 | 200200 | 100100 | 205205 |
| 50 | h1476 |     | 200200 | 200200 | 100100 | 100100 | 100100 | 100100 | 100100 | 300300 | 200200 | 200200 | 100100 | 200200 | 311311 |
| 51 | h1477 |     | 200200 | 200200 | 100100 | 100100 | 100100 | 100100 | 100100 | 300300 | 200200 | 200200 | 100100 | 200200 | 307307 |
| 52 | h1478 |     | 200200 | 200200 | 100100 | 100100 | 100100 | 100100 | 100100 | 300300 | 200200 | 200200 | 100100 | 200200 | 307311 |
| 53 | h1249 | 304 | 200200 | 200200 | 100100 | 100100 | 100100 | 100100 | 100100 | 300300 | 200200 | 200200 | 100100 | 200200 | 205311 |
| 54 | h1251 | 304 | 200200 | 200200 | 100100 | 100100 | 100100 | 100100 | 100100 | 300300 | 200200 | 200200 | 100100 | 200200 | 307307 |
| 55 | h1481 |     | 200200 | 200200 | 100100 | 100100 | 100100 | 100100 | 100100 | 300300 | 200200 | 200200 | 100100 | 200200 | 307307 |
| 56 | h1482 |     | 200200 | 200200 | 100100 | 100100 | 100100 | 100100 | 100100 | 300300 | 200200 | 200200 | 100100 | 200200 | 307307 |
| 57 | h1253 | 304 | 200200 | 200200 | 100100 | 100100 | 100100 | 100100 | 100100 | 300300 | 200200 | 200200 | 100100 | 200200 | 307307 |
| 58 | h1484 |     | 200200 | 100200 | 100100 | 100100 | 100100 | 100100 | 100100 | 300300 | 200200 | 200200 | 100200 | 200200 | 205205 |
| 59 | h1255 | 304 | 200200 | 200200 | 100100 | 100100 | 100100 | 100100 | 100100 | 300300 | 200200 | 200200 | 100100 | 200200 | 307307 |
| 60 | h1486 |     | 200200 | 200200 | 100100 | 100100 | 100100 | 100100 | 100100 | 200200 | 200200 | 100100 | 100200 | 100100 | 311311 |
| 61 | h1257 | 703 | 100100 | 999    | 100100 | 999    | 100100 | 100100 | 100100 | 200200 | 100100 | 100100 | 200200 | 100100 | 205205 |
| 62 | h1488 |     | 100100 | 200200 | 100100 | 100100 | 100100 | 100100 | 100100 | 300300 | 100200 | 200200 | 100100 | 200200 | 205311 |
| 63 | h1489 |     | 200200 | 200200 | 100100 | 100100 | 100100 | 100100 | 100100 | 300300 | 200200 | 200200 | 100100 | 200200 | 307307 |
| 64 | h1490 |     | 200200 | 200200 | 100100 | 100100 | 100100 | 100100 | 100100 | 300300 | 200200 | 200200 | 100100 | 200200 | 307307 |
| 65 | h1491 |     | 200200 | 200200 | 100100 | 100100 | 100100 | 100100 | 100100 | 300300 | 200200 | 200200 | 100100 | 200200 | 307307 |

|     |       |      |        |        |        |        |        |        |        |        |        |        |        |        |        |
|-----|-------|------|--------|--------|--------|--------|--------|--------|--------|--------|--------|--------|--------|--------|--------|
| 66  | h1259 | 100  | 200200 | 200200 | 100100 | 100100 | 100100 | 100100 | 100100 | 300300 | 200200 | 200200 | 100100 | 200200 | 301301 |
| 67  | h1493 |      | 100100 | 200200 | 100100 | 100100 | 100100 | 100100 | 100100 | 300300 | 200200 | 100100 | 100100 | 200200 | 307307 |
| 68  | h1261 | 703  | 100100 | 100100 | 100100 | 100100 | 100100 | 100100 | 100100 | 200200 | 200200 | 100100 | 100100 | 100100 | 205205 |
| 69  | h1263 | 304  | 200200 | 200200 | 100100 | 100100 | 100100 | 100100 | 100100 | 300300 | 200200 | 200200 | 100100 | 200200 | 999    |
| 70  | h1265 | 304  | 200200 | 200200 | 100100 | 100100 | 100100 | 100100 | 100100 | 200200 | 200200 | 100100 | 100100 | 200200 | 297297 |
| 71  | h1267 | 304  | 200200 | 200200 | 100100 | 100100 | 100100 | 100100 | 100100 | 300300 | 200200 | 200200 | 100100 | 200200 | 297297 |
| 72  | h1269 | 304  | 200200 | 200200 | 100100 | 100100 | 100100 | 100100 | 100100 | 300300 | 200200 | 200200 | 100100 | 200200 | 307307 |
| 73  | h1271 | 304  | 200200 | 200200 | 100100 | 100100 | 100100 | 100100 | 100100 | 300300 | 200200 | 200200 | 100100 | 200200 | 311311 |
| 74  | h1273 | 304  | 200200 | 100100 | 100100 | 100100 | 100100 | 100100 | 100100 | 300300 | 200200 | 200200 | 100100 | 200200 | 297311 |
| 75  | h1346 | 703? | 100100 | 100100 | 100100 | 100100 | 100100 | 100100 | 100100 | 200200 | 100100 | 100100 | 200200 | 100100 | 205205 |
| 76  | h1520 |      | 100100 | 100200 | 100100 | 100100 | 100100 | 100100 | 100100 | 200200 | 200200 | 100100 | 200200 | 100100 | 205307 |
| 77  | h1521 |      | 200200 | 200200 | 100100 | 100100 | 100100 | 100100 | 100100 | 300300 | 200200 | 200200 | 100100 | 200200 | 307307 |
| 78  | h1522 |      | 200200 | 200200 | 100100 | 100100 | 100100 | 100100 | 100100 | 300300 | 200200 | 200200 | 100100 | 200200 | 311311 |
| 79  | h1523 |      | 200200 | 200200 | 100100 | 100100 | 100100 | 100100 | 100100 | 300300 | 200200 | 200200 | 100100 | 200200 | 311311 |
| 80  | h1277 | 304  | 200200 | 200200 | 100100 | 100100 | 100100 | 100100 | 100100 | 300300 | 200200 | 200200 | 100100 | 200200 | 307307 |
| 81  | h1525 |      | 200200 | 200200 | 100100 | 100100 | 100100 | 100100 | 100100 | 300300 | 200200 | 200200 | 100100 | 200200 | 307307 |
| 82  | h1526 |      | 200200 | 200200 | 100100 | 100100 | 100100 | 100100 | 100100 | 300300 | 200200 | 200200 | 100100 | 200200 | 307307 |
| 83  | h1527 |      | 100200 | 100200 | 100100 | 100100 | 100100 | 100100 | 100100 | 200200 | 100200 | 100200 | 100200 | 100100 | 205307 |
| 84  | h1528 |      | 200200 | 100200 | 100100 | 100100 | 100100 | 100100 | 100100 | 300300 | 100200 | 200200 | 100100 | 200200 | 205307 |
| 85  | h1362 | 703  | 100100 | 100100 | 100100 | 100100 | 100100 | 100100 | 100100 | 200200 | 100200 | 100100 | 200200 | 100100 | 205205 |
| 86  | h1369 | 704  | 200200 | 200200 | 100100 | 100200 | 100100 | 100100 | 100100 | 300300 | 200200 | 200200 | 100100 | 200200 | 999    |
| 87  | h1530 |      | 100100 | 100100 | 100100 | 100100 | 100100 | 100100 | 100100 | 300300 | 100200 | 100200 | 200200 | 200200 | 205311 |
| 88  | h1531 |      | 200200 | 200200 | 100100 | 100100 | 100100 | 100100 | 100100 | 300300 | 200200 | 200200 | 100100 | 200200 | 307307 |
| 89  | h1532 |      | 100100 | 100100 | 100100 | 100100 | 100100 | 100100 | 100100 | 300300 | 200200 | 200200 | 200200 | 200200 | 311311 |
| 90  | h1533 |      | 200200 | 100100 | 100100 | 100100 | 100100 | 100100 | 100100 | 300300 | 200200 | 200200 | 200200 | 200200 | 205205 |
| 91  | h1281 | 304  | 200200 | 200200 | 100100 | 100100 | 100100 | 100100 | 100100 | 300300 | 200200 | 200200 | 100100 | 200200 | 311311 |
| 92  | h1535 |      | 200200 | 200200 | 100100 | 100100 | 100100 | 100100 | 100100 | 300300 | 200200 | 200200 | 100100 | 200200 | 311311 |
| 93  | h1536 |      | 200200 | 200200 | 100100 | 100100 | 100100 | 100100 | 100100 | 300300 | 200200 | 200200 | 100100 | 200200 | 311311 |
| 94  | h1537 |      | 200200 | 200200 | 100100 | 100100 | 100100 | 100100 | 100100 | 300300 | 200200 | 200200 | 100100 | 200200 | 311311 |
| 95  | h1538 |      | 200200 | 200200 | 100100 | 100100 | 100100 | 100100 | 100100 | 300300 | 200200 | 200200 | 100100 | 200200 | 311311 |
| 96  | h1283 | 304  | 200200 | 100200 | 100100 | 100100 | 100100 | 100100 | 100100 | 300300 | 200200 | 200200 | 100100 | 200200 | 307307 |
| 97  | h1540 |      | 100200 | 200200 | 100100 | 100100 | 100100 | 100100 | 100100 | 300300 | 200200 | 100200 | 100200 | 200200 | 205307 |
| 98  | h1541 |      | 200200 | 200200 | 100100 | 100100 | 100100 | 100100 | 100100 | 300300 | 200200 | 200200 | 100100 | 200200 | 297297 |
| 99  | h1542 |      | 200200 | 200200 | 100100 | 100100 | 100100 | 100100 | 100100 | 300300 | 200200 | 200200 | 100100 | 200200 | 307307 |
| 100 | h1543 |      | 100200 | 200200 | 100100 | 100100 | 100100 | 100100 | 100100 | 300300 | 200200 | 100200 | 100200 | 200200 | 205307 |
| 101 | h1285 | 304  | 200200 | 200200 | 100100 | 100100 | 100100 | 100100 | 100100 | 300300 | 200200 | 200200 | 100100 | 200200 | 307307 |
| 102 | h1545 |      | 200200 | 200200 | 100100 | 100100 | 100100 | 100100 | 100100 | 300300 | 200200 | 200200 | 100100 | 200200 | 307307 |
| 103 | h1546 |      | 200200 | 200200 | 100100 | 100100 | 100100 | 100100 | 100100 | 300300 | 200200 | 200200 | 100100 | 200200 | 307307 |
| 104 | h1547 |      | 200200 | 200200 | 100100 | 100100 | 100100 | 100100 | 100100 | 300300 | 200200 | 200200 | 100100 | 200200 | 297307 |
| 105 | h1548 |      | 200200 | 200200 | 100100 | 100100 | 100100 | 100100 | 100100 | 300300 | 200200 | 200200 | 100100 | 200200 | 297297 |
| 106 | h1287 | 304  | 200200 | 200200 | 100100 | 100100 | 100100 | 100100 | 100100 | 300300 | 200200 | 200200 | 100100 | 200200 | 311311 |
| 107 | h1554 |      | 200200 | 200200 | 100100 | 100100 | 100100 | 100100 | 100100 | 300300 | 200200 | 200200 | 100100 | 200200 | 307307 |

|     |       |     |        |        |        |        |        |        |        |        |        |        |        |        |        |
|-----|-------|-----|--------|--------|--------|--------|--------|--------|--------|--------|--------|--------|--------|--------|--------|
| 108 | h1559 |     | 100100 | 100100 | 100100 | 100100 | 100100 | 100100 | 100100 | 200200 | 100200 | 100100 | 200200 | 100100 | 205205 |
| 109 | h1564 |     | 100100 | 100100 | 100100 | 100100 | 100100 | 100100 | 100100 | 200200 | 100200 | 100100 | 200200 | 100100 | 205205 |
| 110 | h1566 |     | 100100 | 100100 | 100100 | 100100 | 100100 | 100100 | 100100 | 200200 | 100100 | 200200 | 200200 | 100100 | 205205 |
| 111 | h1568 |     | 100100 | 200200 | 100100 | 100100 | 100100 | 100100 | 100100 | 300300 | 200200 | 100200 | 100200 | 200200 | 205307 |
| 112 | h1289 | 304 | 200200 | 100200 | 100100 | 100100 | 100100 | 100100 | 100100 | 300300 | 200200 | 200200 | 100100 | 200200 | 307307 |
| 113 | h1577 |     | 200200 | 200200 | 100100 | 100100 | 100100 | 100100 | 100100 | 300300 | 200200 | 200200 | 100100 | 200200 | 307307 |
| 114 | h1291 | 304 | 200200 | 100100 | 100100 | 100100 | 100100 | 100100 | 100100 | 300300 | 200200 | 200200 | 100100 | 200200 | 307307 |
| 115 | h1584 |     | 200200 | 200200 | 100100 | 100100 | 100100 | 100100 | 100100 | 300300 | 200200 | 200200 | 100100 | 200200 | 307307 |
| 116 | h1589 |     | 200200 | 200200 | 100100 | 100100 | 100100 | 100100 | 100100 | 300300 | 200200 | 200200 | 100100 | 200200 | 307307 |
| 117 | h1594 |     | 200200 | 200200 | 100100 | 100100 | 100100 | 100100 | 100100 | 300300 | 200200 | 200200 | 100100 | 200200 | 307307 |
| 118 | h1361 | 300 | 100100 | 100100 | 100100 | 100100 | 100100 | 100100 | 100100 | 200200 | 200200 | 100200 | 200200 | 200200 | 205307 |
| 119 | h1600 |     | 200200 | 200200 | 100100 | 100100 | 100100 | 100100 | 100100 | 300300 | 200200 | 200200 | 100100 | 200200 | 307307 |
| 120 | h1601 |     | 200200 | 200200 | 100100 | 100100 | 100100 | 100100 | 100100 | 300300 | 200200 | 200200 | 100100 | 200200 | 297297 |
| 121 | h1602 |     | 200200 | 200200 | 100100 | 100100 | 100100 | 100100 | 100100 | 300300 | 200200 | 200200 | 100100 | 200200 | 307307 |
| 122 | h1354 | 707 | 200200 | 100100 | 100100 | 100100 | 100100 | 100100 | 100100 | 300300 | 100200 | 100100 | 200200 | 100100 | 311311 |
| 123 | h1604 |     | 100100 | 100100 | 100100 | 100100 | 100100 | 100100 | 100100 | 200200 | 100200 | 100100 | 100100 | 100100 | 205205 |
| 124 | h1605 |     | 100100 | 100100 | 100100 | 100100 | 100100 | 100100 | 100100 | 200200 | 100200 | 100100 | 200200 | 100100 | 205205 |
| 125 | h1606 |     | 100200 | 100100 | 100100 | 100100 | 100100 | 100100 | 100100 | 200200 | 100200 | 100100 | 100200 | 100100 | 311311 |
| 126 | h1607 |     | 200200 | 200200 | 100100 | 100100 | 100100 | 100100 | 100100 | 200200 | 200200 | 200200 | 100100 | 200200 | 297301 |
| 127 | h1608 |     | 200200 | 200200 | 100100 | 100100 | 100100 | 100100 | 100100 | 200200 | 100200 | 100200 | 100200 | 200200 | 205307 |
| 128 | h1609 |     | 100200 | 100200 | 100100 | 100100 | 100100 | 100100 | 100100 | 300300 | 200200 | 100200 | 100200 | 200200 | 205307 |
| 129 | h1610 |     | 100100 | 200200 | 100100 | 100100 | 100100 | 100100 | 100100 | 300300 | 200200 | 200200 | 100100 | 200200 | 297297 |
| 130 | h1611 |     | 100100 | 200200 | 100100 | 100100 | 100100 | 100100 | 100100 | 300300 | 200200 | 200200 | 100100 | 200200 | 307307 |
| 131 | h1612 |     | 100100 | 100200 | 100100 | 100100 | 100100 | 100100 | 100100 | 300300 | 200200 | 100200 | 100200 | 200200 | 205307 |
| 132 | h1613 |     | 200200 | 200200 | 100100 | 100100 | 100100 | 100100 | 100100 | 300300 | 200200 | 200200 | 100100 | 200200 | 297297 |
| 133 | h1614 |     | 200200 | 200200 | 100100 | 100100 | 100100 | 100100 | 100100 | 300300 | 200200 | 200200 | 100100 | 200200 | 297297 |
| 134 | h1615 |     | 100100 | 100100 | 100100 | 100100 | 100100 | 100100 | 100100 | 300300 | 200200 | 200200 | 200200 | 200200 | 205205 |
| 135 | h1619 |     | 200200 | 200200 | 100100 | 100100 | 100100 | 100100 | 100100 | 300300 | 200200 | 200200 | 100100 | 200200 | 311311 |
| 136 | h1620 |     | 200200 | 200200 | 100100 | 100100 | 100100 | 100100 | 100100 | 300300 | 200200 | 200200 | 100100 | 100100 | 307307 |
| 137 | h1621 |     | 100100 | 100100 | 100100 | 100100 | 100100 | 100100 | 100100 | 300300 | 200200 | 100100 | 200200 | 200200 | 217217 |
| 138 | h1622 |     | 100100 | 200200 | 100100 | 100100 | 100100 | 100100 | 100100 | 300300 | 200200 | 200200 | 100100 | 200200 | 307307 |
| 139 | h1623 |     | 100100 | 200200 | 100100 | 100100 | 100100 | 100100 | 100100 | 300300 | 200200 | 200200 | 100100 | 100100 | 317317 |
| 140 | h1624 |     | 200200 | 200200 | 100100 | 100100 | 100100 | 100100 | 100100 | 300300 | 200200 | 200200 | 100100 | 200200 | 217217 |
| 141 | h1625 |     | 100100 | 200200 | 100100 | 100100 | 100100 | 100100 | 100100 | 300300 | 200200 | 200200 | 100100 | 100100 | 205205 |
| 142 | h1626 |     | 200200 | 200200 | 100100 | 100100 | 100100 | 100100 | 100100 | 300300 | 200200 | 200200 | 100100 | 200200 | 307307 |
| 143 | h1297 | 304 | 200200 | 200200 | 100100 | 100100 | 100100 | 100100 | 100100 | 300300 | 200200 | 100100 | 100100 | 200200 | 311311 |
| 144 | h1299 | 304 | 200200 | 200200 | 100100 | 100100 | 100100 | 100100 | 100100 | 300300 | 200200 | 200200 | 100100 | 200200 | 311311 |
| 145 | h1637 |     | 200200 | 200200 | 100100 | 100100 | 100100 | 100100 | 100100 | 300300 | 200200 | 200200 | 100100 | 200200 | 307307 |
| 146 | h1642 |     | 100100 | 200200 | 100100 | 100100 | 100100 | 100100 | 100100 | 300300 | 200200 | 100100 | 100100 | 100100 | 311311 |
| 147 | h1647 |     | 100100 | 100100 | 100100 | 100100 | 100100 | 100100 | 100100 | 200200 | 100200 | 100100 | 200200 | 100200 | 205205 |
| 148 | h1651 |     | 100200 | 100100 | 100100 | 100100 | 100100 | 100100 | 100100 | 200200 | 200200 | 100100 | 200200 | 100200 | 205205 |
| 149 | h1656 |     | 200200 | 100200 | 100100 | 100100 | 100100 | 100100 | 100100 | 200200 | 200200 | 100200 | 100200 | 100200 | 205311 |

|     |       |     |        |        |        |        |        |        |        |        |        |        |        |        |        |
|-----|-------|-----|--------|--------|--------|--------|--------|--------|--------|--------|--------|--------|--------|--------|--------|
| 150 | h1301 | 304 | 200200 | 200200 | 100100 | 100100 | 100100 | 100100 | 100100 | 300300 | 200200 | 200200 | 100100 | 200200 | 307307 |
| 151 | h1658 |     | 200200 | 200200 | 100100 | 100100 | 100100 | 100100 | 100100 | 300300 | 200200 | 100100 | 100100 | 100100 | 297297 |
| 152 | h1662 |     | 200200 | 200200 | 100100 | 100100 | 100100 | 100100 | 100100 | 300300 | 200200 | 200200 | 100100 | 100100 | 305311 |
| 153 | h1664 |     | 200200 | 200200 | 100100 | 100100 | 100100 | 100100 | 100100 | 300300 | 200200 | 200200 | 100100 | 100100 | 311311 |
| 154 | h1669 |     | 200200 | 200200 | 100100 | 100100 | 100100 | 100100 | 100100 | 300300 | 200200 | 200200 | 100100 | 100200 | 297297 |
| 155 | h1670 |     | 100100 | 100100 | 100100 | 100100 | 100100 | 100100 | 100100 | 300300 | 200200 | 100100 | 200200 | 100200 | 205205 |
| 156 | h1671 |     | 200200 | 200200 | 100100 | 100100 | 100100 | 100100 | 100100 | 300300 | 200200 | 200200 | 100100 | 100200 | 205205 |
| 157 | h1303 | 304 | 200200 | 100200 | 100100 | 100100 | 100100 | 100100 | 100100 | 300300 | 200200 | 200200 | 100100 | 200200 | 297297 |
| 158 | h1305 | 304 | 200200 | 200200 | 100100 | 100100 | 100100 | 100100 | 100100 | 300300 | 200200 | 200200 | 100100 | 200200 | 311311 |
| 159 | h1682 |     | 200200 | 200200 | 100100 | 100100 | 100100 | 100100 | 100100 | 300300 | 200200 | 200200 | 100100 | 200200 | 311311 |
| 160 | h1687 |     | 200200 | 200200 | 100100 | 100100 | 100100 | 100100 | 100100 | 300300 | 200200 | 200200 | 100100 | 200200 | 297297 |
| 161 | h1690 |     | 200200 | 200200 | 100100 | 100100 | 100100 | 100100 | 100100 | 300300 | 200200 | 200200 | 100100 | 200200 | 205205 |
| 162 | h1692 |     | 100100 | 200200 | 100100 | 100100 | 100100 | 100100 | 100100 | 200200 | 200200 | 200200 | 200200 | 200200 | 305305 |
| 163 | h1307 | 703 | 100100 | 100100 | 100100 | 100100 | 100100 | 100100 | 100100 | 200200 | 100100 | 100100 | 200200 | 200200 | 205205 |
| 164 | h1695 |     | 100100 | 100200 | 100100 | 100100 | 100100 | 100100 | 100100 | 300300 | 200200 | 100100 | 200200 | 200200 | 205205 |
| 165 | h1696 |     | 200200 | 200200 | 100100 | 100100 | 100100 | 100100 | 100100 | 300300 | 200200 | 200200 | 100100 | 200200 | 297297 |
| 166 | h1697 |     | 200200 | 100100 | 100100 | 100100 | 100100 | 100100 | 100100 | 300300 | 200200 | 100100 | 200200 | 200200 | 311311 |
| 167 | h1698 |     | 200200 | 100200 | 100100 | 100100 | 100100 | 100100 | 100100 | 300300 | 200200 | 100200 | 100200 | 200200 | 307311 |
| 168 | h1309 | 707 | 200200 | 100100 | 100100 | 100100 | 100100 | 100100 | 100100 | 300300 | 100200 | 100100 | 200200 | 200200 | 311311 |
| 169 | h1700 |     | 200200 | 200200 | 100100 | 100100 | 100100 | 100100 | 100100 | 300300 | 200200 | 200200 | 100100 | 100100 | 311311 |
| 170 | h1701 |     | 200200 | 200200 | 100100 | 100100 | 100100 | 100100 | 100100 | 300300 | 200200 | 200200 | 100100 | 200200 | 311311 |
| 171 | h1702 |     | 200200 | 100200 | 100100 | 100100 | 100100 | 100100 | 100100 | 300300 | 200200 | 100200 | 100200 | 200200 | 311311 |
| 172 | h1703 |     | 100200 | 100200 | 100100 | 100100 | 100100 | 100100 | 100100 | 300300 | 200200 | 200200 | 100200 | 200200 | 307307 |
| 173 | h1311 | 304 | 200200 | 200200 | 100100 | 100100 | 100100 | 100100 | 100100 | 300300 | 200200 | 100100 | 100100 | 200200 | 307307 |
| 174 | h1705 |     | 100200 | 100200 | 100100 | 100100 | 100100 | 100100 | 100100 | 300300 | 200200 | 200200 | 100200 | 200200 | 307307 |
| 175 | h1706 |     | 200200 | 200200 | 100100 | 100100 | 100100 | 100100 | 100100 | 300300 | 200200 | 200200 | 100100 | 200200 | 307307 |
| 176 | h1707 |     | 100100 | 100200 | 100100 | 100100 | 100100 | 100100 | 100100 | 300300 | 100200 | 100100 | 100100 | 200200 | 217217 |
| 177 | h1708 |     | 200200 | 100100 | 100100 | 100100 | 100100 | 100100 | 100100 | 300300 | 100200 | 100100 | 200200 | 200200 | 205311 |
| 178 | h1313 | 703 | 200200 | 100100 | 100100 | 100100 | 100100 | 100100 | 100100 | 200200 | 100100 | 100100 | 200200 | 100100 | 205205 |
| 179 | h1710 |     | 200200 | 100200 | 100100 | 100100 | 100100 | 100100 | 100100 | 300300 | 200200 | 200200 | 100200 | 200200 | 307307 |
| 180 | h1711 |     | 200200 | 200200 | 100100 | 100100 | 100100 | 100100 | 100100 | 300300 | 200200 | 200200 | 100100 | 200200 | 311311 |
| 181 | h1712 |     | 200200 | 200200 | 100100 | 100100 | 100100 | 100100 | 100100 | 300300 | 200200 | 200200 | 999    | 200200 | 307307 |
| 182 | h1713 |     | 200200 | 200200 | 100100 | 100100 | 100100 | 100100 | 100100 | 300300 | 200200 | 200200 | 100100 | 200200 | 311311 |
| 183 | h1343 | 703 | 100100 | 100100 | 100100 | 100100 | 100100 | 100100 | 100100 | 200200 | 100100 | 100100 | 200200 | 200200 | 205205 |
| 184 | h1344 | 704 | 200200 | 200200 | 100100 | 100100 | 100100 | 100100 | 100100 | 300300 | 200200 | 200200 | 100100 | 200200 | 307307 |
| 185 | h1715 |     | 200200 | 200200 | 100100 | 100100 | 100100 | 100100 | 100100 | 300300 | 200200 | 200200 | 100100 | 100100 | 307307 |
| 186 | h1716 |     | 200200 | 200200 | 100100 | 100100 | 100100 | 100100 | 100100 | 300300 | 200200 | 200200 | 100100 | 200200 | 311311 |
| 187 | h1717 |     | 200200 | 200200 | 100100 | 100100 | 100100 | 100100 | 100100 | 300300 | 200200 | 200200 | 100100 | 200200 | 307307 |
| 188 | h1317 | 714 | 200200 | 200200 | 100100 | 100100 | 100100 | 100100 | 100100 | 300300 | 200200 | 200200 | 100100 | 200200 | 297297 |
| 189 | h1719 |     | 200200 | 200200 | 100100 | 100100 | 100100 | 100100 | 100100 | 300300 | 200200 | 200200 | 100100 | 200200 | 307307 |
| 190 | h1720 |     | 200200 | 200200 | 100100 | 100100 | 100100 | 100100 | 100100 | 300300 | 200200 | 200200 | 100100 | 200200 | 307307 |
| 191 | h1721 |     | 100200 | 200200 | 100100 | 100100 | 100100 | 100100 | 100100 | 300300 | 200200 | 100200 | 100200 | 200200 | 307307 |

|     |       |     |        |        |        |        |        |        |        |        |        |        |        |        |        |
|-----|-------|-----|--------|--------|--------|--------|--------|--------|--------|--------|--------|--------|--------|--------|--------|
| 192 | h1722 |     | 200200 | 200200 | 100100 | 100100 | 100100 | 100100 | 100100 | 300300 | 200200 | 200200 | 100200 | 200200 | 307307 |
| 193 | h1319 | 703 | 100100 | 100100 | 100100 | 200200 | 100100 | 100100 | 100100 | 200200 | 100200 | 100100 | 200200 | 100100 | 205205 |
| 194 | h1728 |     | 200200 | 200200 | 100100 | 100100 | 100100 | 100100 | 100100 | 300300 | 200200 | 200200 | 100100 | 200200 | 297297 |
| 195 | h1733 |     | 200200 | 200200 | 100100 | 100100 | 100100 | 100100 | 100100 | 300300 | 200200 | 200200 | 100100 | 200200 | 307307 |
| 196 | h1735 |     | 200200 | 200200 | 100100 | 100100 | 100100 | 100100 | 100100 | 300300 | 200200 | 200200 | 100100 | 100100 | 307307 |
| 197 | h1740 |     | 200200 | 200200 | 100100 | 100100 | 100100 | 100100 | 100100 | 300300 | 200200 | 200200 | 100100 | 200200 | 301301 |
| 198 | h1321 | 304 | 200200 | 200200 | 100100 | 100100 | 100100 | 100100 | 100100 | 300300 | 200200 | 200200 | 100100 | 200200 | 297297 |
| 199 | h1750 |     | 999    | 200200 | 100100 | 100100 | 100100 | 100100 | 100100 | 300300 | 200200 | 200200 | 100100 | 200200 | 307307 |
| 200 | h1323 | 304 | 200200 | 200200 | 100100 | 100100 | 100100 | 100100 | 100100 | 300300 | 200200 | 200200 | 100100 | 200200 | 311311 |
| 201 | h1755 |     | 200200 | 200200 | 100100 | 100100 | 100100 | 100100 | 100100 | 300300 | 200200 | 200200 | 100100 | 200200 | 307307 |
| 202 | h1757 |     | 200200 | 200200 | 100100 | 100100 | 100100 | 100100 | 100100 | 300300 | 200200 | 200200 | 100100 | 200200 | 311311 |
| 203 | h1758 |     | 200200 | 200200 | 100100 | 100100 | 100100 | 100100 | 100100 | 300300 | 200200 | 200200 | 100100 | 200200 | 307307 |
| 204 | h1760 |     | 200200 | 200200 | 100100 | 100100 | 100100 | 100100 | 100100 | 300300 | 200200 | 200200 | 100100 | 200200 | 307311 |
| 205 | h1761 |     | 200200 | 200200 | 100100 | 100100 | 100100 | 100100 | 100100 | 300300 | 200200 | 200200 | 100100 | 200200 | 307307 |
| 206 | h1325 | 304 | 200200 | 200200 | 100100 | 100100 | 100100 | 100100 | 100100 | 300300 | 200200 | 200200 | 100100 | 200200 | 297297 |
| 207 | h1764 |     | 200200 | 200200 | 100100 | 100100 | 100100 | 100100 | 100100 | 300300 | 200200 | 200200 | 100100 | 200200 | 311311 |
| 208 | h1327 | 304 | 200200 | 200200 | 100100 | 100100 | 100100 | 100100 | 100100 | 300300 | 200200 | 200200 | 100100 | 200200 | 317317 |
| 209 | h1765 |     | 200200 | 200200 | 100100 | 100100 | 100100 | 100100 | 100100 | 300300 | 200200 | 200200 | 100100 | 200200 | 297297 |
| 210 | h1767 |     | 200200 | 200200 | 100100 | 100100 | 100100 | 100100 | 100100 | 300300 | 200200 | 200200 | 100100 | 200200 | 297317 |
| 211 | h1329 | 707 | 200200 | 200200 | 100100 | 100100 | 100100 | 100100 | 100100 | 300300 | 200200 | 200200 | 100100 | 200200 | 315315 |
| 212 | h1769 |     | 200200 | 200200 | 100100 | 100100 | 100100 | 100100 | 100100 | 300300 | 200200 | 200200 | 100100 | 200200 | 311311 |
| 213 | h1770 |     | 200200 | 200200 | 100100 | 100100 | 100100 | 100100 | 100100 | 300300 | 200200 | 200200 | 100100 | 200200 | 307311 |
| 214 | h1771 |     | 100200 | 100200 | 100100 | 100100 | 100100 | 100100 | 100100 | 300300 | 200200 | 100200 | 100200 | 200200 | 205205 |
| 215 | h1772 |     | 100200 | 100200 | 100100 | 100100 | 100100 | 100100 | 100100 | 300300 | 200200 | 200200 | 100100 | 200200 | 307307 |
| 216 | h1773 |     | 200200 | 200200 | 100100 | 100100 | 100100 | 100100 | 100100 | 300300 | 200200 | 200200 | 100100 | 200200 | 297297 |
| 217 | h1774 |     | 200200 | 200200 | 100100 | 100100 | 100100 | 100100 | 100100 | 300300 | 200200 | 200200 | 100100 | 200200 | 297297 |
| 218 | h1775 |     | 200200 | 200200 | 100100 | 100100 | 100100 | 100100 | 100100 | 300300 | 200200 | 200200 | 100100 | 200200 | 297297 |
| 219 | h1776 |     | 200200 | 200200 | 100100 | 100100 | 100100 | 100100 | 100100 | 300300 | 200200 | 200200 | 100100 | 200200 | 297297 |
| 220 | h1777 |     | 200200 | 200200 | 100100 | 100100 | 100100 | 100100 | 100100 | 300300 | 200200 | 200200 | 100100 | 200200 | 301301 |
| 221 | h1778 |     | 200200 | 200200 | 100100 | 100100 | 100100 | 100100 | 100100 | 300300 | 200200 | 200200 | 100100 | 200200 | 297297 |
| 222 | h1779 |     | 100200 | 100200 | 100100 | 100100 | 100100 | 100100 | 100100 | 300300 | 200200 | 100200 | 100200 | 200200 | 205205 |
| 223 | h1780 |     | 200200 | 100200 | 100100 | 100100 | 100100 | 100100 | 100100 | 300300 | 200200 | 200200 | 100100 | 200200 | 311311 |
| 224 | h1781 |     | 100100 | 100100 | 100100 | 100100 | 100100 | 100100 | 100100 | 300300 | 100200 | 100100 | 100100 | 200200 | 205205 |
| 225 | h1782 |     | 100100 | 100100 | 100100 | 100100 | 100100 | 100100 | 100100 | 300300 | 100200 | 100100 | 200200 | 200200 | 205205 |
| 226 | h1783 |     | 100100 | 100200 | 100100 | 100100 | 100100 | 100100 | 100100 | 300300 | 200200 | 100100 | 200200 | 200200 | 205205 |
| 227 | h1784 |     | 200200 | 200200 | 100100 | 100100 | 100100 | 100100 | 100100 | 300300 | 200200 | 200200 | 100100 | 200200 | 311311 |
| 228 | h1785 |     | 200200 | 200200 | 100100 | 100100 | 100100 | 100100 | 100100 | 300300 | 200200 | 200200 | 100100 | 100100 | 305305 |
| 229 | h1331 | 304 | 200200 | 100200 | 100100 | 100100 | 100100 | 100100 | 100100 | 300300 | 200200 | 200200 | 100100 | 200200 | 297297 |
| 230 | h1791 |     | 200200 | 200200 | 100100 | 100100 | 100100 | 100100 | 100100 | 300300 | 200200 | 200200 | 100100 | 200200 | 297297 |
| 231 | h1796 |     | 200200 | 200200 | 100100 | 100100 | 100100 | 100100 | 100100 | 300300 | 200200 | 200200 | 100100 | 200200 | 297297 |
| 232 | h1801 |     | 200200 | 200200 | 100100 | 100100 | 100100 | 100100 | 100100 | 300300 | 200200 | 200200 | 100100 | 200200 | 311311 |
| 233 | h1806 |     | 200200 | 200200 | 100100 | 100100 | 100100 | 100100 | 100100 | 300300 | 200200 | 200200 | 100100 | 200200 | 311311 |

|     |       |     |        |        |        |        |        |        |        |        |        |        |        |        |        |
|-----|-------|-----|--------|--------|--------|--------|--------|--------|--------|--------|--------|--------|--------|--------|--------|
| 234 | h1811 |     | 200200 | 200200 | 100100 | 100100 | 100100 | 100100 | 100100 | 300300 | 100200 | 200200 | 100100 | 200200 | 297297 |
| 235 | h1815 |     | 100100 | 200200 | 100100 | 100100 | 100100 | 100100 | 100100 | 300300 | 200200 | 100100 | 100200 | 200200 | 307307 |
| 236 | h1819 |     | 200200 | 200200 | 100100 | 100100 | 100100 | 100100 | 100100 | 300300 | 200200 | 200200 | 100200 | 200200 | 205205 |
| 237 | h1333 | 304 | 999    | 100200 | 100100 | 100200 | 100100 | 100100 | 100100 | 300300 | 200200 | 200200 | 100100 | 200200 | 311311 |
| 238 | h1335 | 304 | 200200 | 100100 | 100100 | 100100 | 100100 | 100100 | 100100 | 300300 | 200200 | 100100 | 200200 | 200200 | 205205 |
| 239 | h1828 |     | 200200 | 100100 | 100100 | 100100 | 100100 | 100100 | 100100 | 300300 | 200200 | 200200 | 100200 | 200200 | 311311 |
| 240 | h1829 |     | 100100 | 200200 | 100100 | 100100 | 100100 | 100100 | 100100 | 300300 | 200200 | 200200 | 100100 | 200200 | 205205 |
| 241 | h1832 |     | 200200 | 200200 | 100100 | 100100 | 100100 | 100100 | 100100 | 300300 | 200200 | 200200 | 100100 | 200200 | 307307 |
| 242 | h1833 |     | 200200 | 200200 | 100100 | 100100 | 100100 | 100100 | 100100 | 300300 | 200200 | 200200 | 100100 | 200200 | 307307 |
| 243 | h1337 | 304 | 200200 | 100200 | 100100 | 100200 | 100100 | 100100 | 100100 | 300300 | 200200 | 200200 | 100100 | 200200 | 297297 |
| 244 | h1835 |     | 200200 | 200200 | 100100 | 100100 | 100100 | 100100 | 100100 | 300300 | 200200 | 200200 | 100100 | 200200 | 307307 |
| 245 | h1836 |     | 100100 | 200200 | 100100 | 100100 | 100100 | 100100 | 100100 | 300300 | 100200 | 100100 | 200200 | 200200 | 205205 |
| 246 | h1837 |     | 200200 | 200200 | 100100 | 100100 | 100100 | 100100 | 100100 | 200200 | 200200 | 100100 | 200200 | 200200 | 205205 |
| 247 | h1838 |     | 100200 | 100200 | 100100 | 100100 | 100100 | 100100 | 100100 | 300300 | 200200 | 200200 | 100200 | 200200 | 205205 |
| 248 | h1339 | 307 | 100100 | 200200 | 100100 | 100100 | 100100 | 100100 | 100100 | 200200 | 100200 | 100100 | 200200 | 100100 | 205205 |
| 249 | h1840 |     | 200200 | 200200 | 100100 | 100100 | 100100 | 100100 | 100100 | 300300 | 200200 | 200200 | 100100 | 200200 | 311311 |
| 250 | h1841 |     | 200200 | 200200 | 100100 | 100100 | 100100 | 100100 | 100100 | 300300 | 200200 | 200200 | 100100 | 100100 | 297297 |

**Supplementary Table S2.** Compare of the three clusters obtained by Delmotte et al. (2008) and Ahmed et al. (2012) with the two clusters detected in this study.

| Delmotte et al. (2008) and Ahmed et al. (2012) |           |           | This study (with only the first two cluster) |           |
|------------------------------------------------|-----------|-----------|----------------------------------------------|-----------|
| cluster 1                                      | cluster 2 | cluster 3 | cluster 1                                    | cluster 2 |
| 100                                            | 307       | 314       | 100                                          | 300*      |
| 300                                            | 700       | 334       | 304                                          | 307       |
| 304                                            | 703       | 704       | 704*                                         | 703       |
|                                                | 707       | 710       | 714*                                         | 707       |
|                                                | 730       | 714       |                                              |           |

\* in this study, races 704, 714 and 300 have a different origin that those found in the previous studies (see discussion).

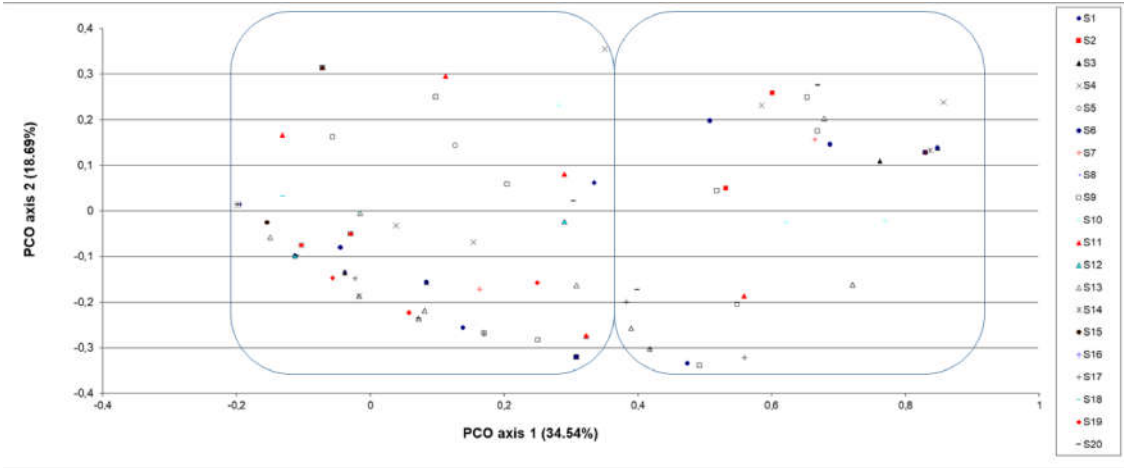

**Supplementary Figure S1.** Plot of the principal coordinate analysis (PCO) showing the distribution of the 250 *P. halstedii* within the field at the 20 sites in the study.



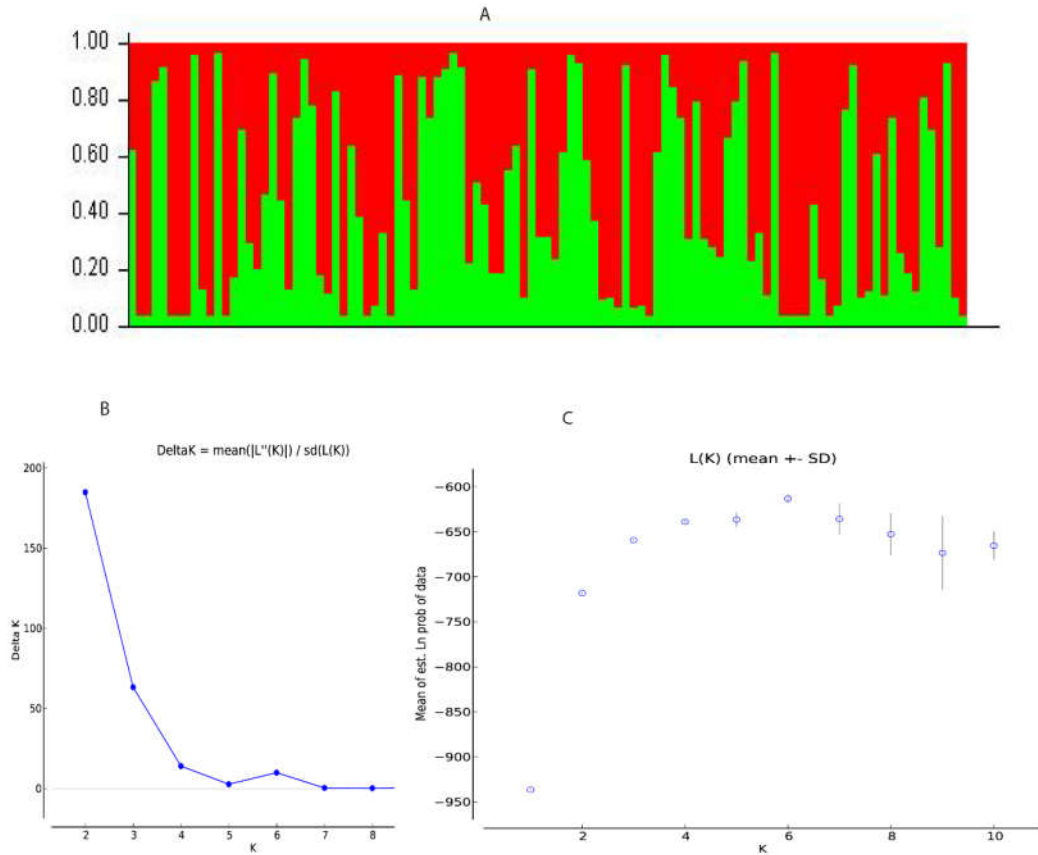

**Supplementary Figure S2.** Summary of the results of *P. halstedii* from the STRUCTURE analysis. The analysis was performed using the admixture model allowing for correlated frequencies: Electropherograms representing the two clusters found in the study (A). Dots plots representing the population assignment of the individuals for the assumption of delta  $K = 2$  (B). Graph of  $\ln P(K)$  (bars) for the different  $K$  population assumptions (C).
